# Supplementary material for: Messenger RNA/polymeric carrier nanoparticles for delivery of heme oxygenase-1 gene in the post-ischemic brain
Source: Royal Society of Chemistry journal article supplement (doi:10.1039/d0bm00076k), 2020-01-01
Supplement: d0bm00076k1.pdf [file d0bm00076k1.pdf]

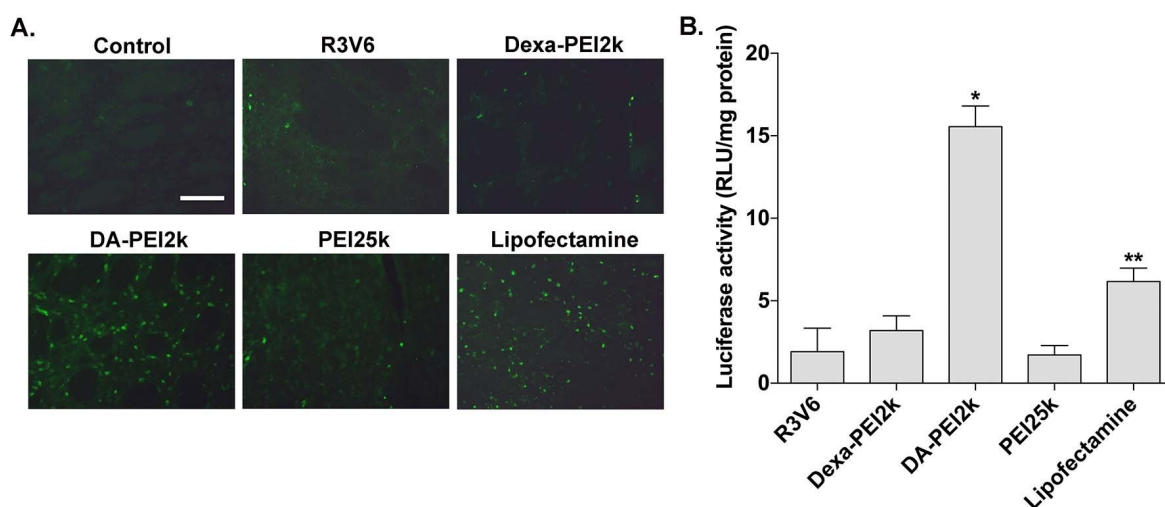

**Figure S1. *In vitro* transfection of pDNA with various carriers**

The EGFP-pDNA/carrier and Luciferase-pDNA/carrier complexes were prepared at their optimal ratios and transfected into the Neuro2A cells. After 24 hrs, transfection efficiency was evaluated by (A) fluorescence microscopy and (B) luciferase assay. \*,\*\*P<0.01 as compared with the other groups.
